# Supplementary material
Source: publisher site journal article supplement (https://www.dovepress.com/article/365429)
Supplement: Supplementary file 1 [file get_supplementary_file.php]

**Appendix 1** Key information about our previously conducted systematic review, submitted for publication and currently under review

## **Methods**

- Eligibility criteria: Discrete choice experiments and conjoint analysis ranking or rating tasks on preferences of the general population for fecal occult blood testing, guaiac-based or immunochemical , sigmoidoscopy, and/or colonoscopy; primary research; English-language studies; publications since January 2000
- Systematic search (last in November 2021) in PubMed, Embase, Web of Science, Biomedical Reference Collection: Corporate Edition, LIVIVO and PsycINFO
- Search strategy: Combination of database specific controlled vocabulary search terms with free-text terms related to the categories screening test, colorectal cancer, screening, colorectal cancer screening, preferences
- Study selection: Title-, abstract- and full text screening independently by two reviewers
- Data (general information, attributes and levels, utility values) were extracted by one reviewer, and checked by another one
- Relative importance of attributes was calculated
- Risk of bias in individual studies was assessed independently by two reviewers
- Disagreements in study selection and risk of bias rating were resolved by discussion between the two reviewers; if no agreement could be reached, a third person was consulted

## **Results**

- Publications included in qualitative synthesis (n=23)
- Extracted attributes were assigned to six categories: Procedure-related characteristics, test characteristics, benefits, harms, structural characteristics of health care, and level of evidence

**Appendix 2** Number (n) of active participants per attribute, stratified by colonoscopy experience

|                                                             | With colonoscopy experience |           | Without colonoscopy experience |           |
|-------------------------------------------------------------|-----------------------------|-----------|--------------------------------|-----------|
|                                                             | Deductive                   | Inductive | Deductive                      | Inductive |
| Participants (n)                                            | 10                          | 10        | 10                             | 10        |
| <b>Procedure-related characteristics</b>                    |                             |           |                                |           |
| Preparation                                                 | 9                           |           | 7                              |           |
| Procedure                                                   | 7                           |           | 10                             |           |
| Sedation <sup>a</sup>                                       |                             | 7         |                                | 8         |
| Purpose                                                     | 5                           |           | 5                              |           |
| Frequency                                                   | 3                           |           | 4                              |           |
| Inability to work <sup>a</sup>                              |                             | 8         |                                | 6         |
| Location                                                    | 2                           |           | 4                              |           |
| Transportation home <sup>a</sup>                            |                             | 5         |                                | 5         |
| Follow-up test required                                     | 1                           |           | 1                              |           |
| Duration                                                    | 4                           |           | 0                              |           |
| Mode of test delivery                                       | 1                           |           | 0                              |           |
| <b>Measures of the validity of a screening test</b>         |                             |           |                                |           |
| Predictive values <sup>a</sup>                              |                             | 8         |                                | 9         |
| Sensitivity/Specificity                                     | 7                           |           | 8                              |           |
| 1-Sensitivity/1-Specificity                                 | 3                           |           | 6                              |           |
| <b>Benefits</b>                                             |                             |           |                                |           |
| Reduction in colorectal cancer mortality                    | 6                           |           | 4                              |           |
| Reduction in colorectal cancer incidence                    | 2                           |           | 5                              |           |
| Colorectal cancer survival                                  | 2                           |           | 0                              |           |
| Benefits <sup>b</sup>                                       | 1                           |           | 0                              |           |
| <b>Harms</b>                                                |                             |           |                                |           |
| Test-related pain and/or discomfort                         | 7                           |           | 6                              |           |
| Risk of complications                                       | 1                           |           | 6                              |           |
| <b>Structural characteristics of health care</b>            |                             |           |                                |           |
| Information processes                                       | 6                           |           | 4                              |           |
| Waiting-time for initial screening colonoscopy <sup>a</sup> |                             | 0         |                                | 2         |
| Travel time to screening facility                           | 0                           |           | 2                              |           |
| Waiting time for follow-up-test                             | 0                           |           | 1                              |           |

**Notes:** The bold text indicates the attribute categories; <sup>a</sup>Inductively derived attributes; <sup>b</sup>Includes text passages that indicated a benefit but could not be assigned to a specific benefit outcome due to lack of information.

**Appendix 3** Number (n) of active participants per attribute, stratified by sex

|                                                             | Women     |           | Men       |           |
|-------------------------------------------------------------|-----------|-----------|-----------|-----------|
|                                                             | Deductive | Inductive | Deductive | Inductive |
| Participants (n)                                            | 10        | 10        | 10        | 10        |
| <b>Procedure-related characteristics</b>                    |           |           |           |           |
| Preparation                                                 | 8         |           | 8         |           |
| Procedure                                                   | 9         |           | 8         |           |
| Sedation <sup>a</sup>                                       |           | 8         |           | 8         |
| Purpose                                                     | 6         |           | 4         |           |
| Frequency                                                   | 2         |           | 5         |           |
| Inability to work <sup>a</sup>                              |           | 6         |           | 8         |
| Location                                                    | 5         |           | 1         |           |
| Transportation home <sup>a</sup>                            |           | 5         |           | 5         |
| Follow-up test required                                     | 0         |           | 2         |           |
| Duration                                                    | 3         |           | 1         |           |
| Mode of test delivery                                       | 0         |           | 1         |           |
| <b>Measures of the validity of a screening test</b>         |           |           |           |           |
| Predictive values <sup>a</sup>                              |           | 8         |           | 9         |
| Sensitivity/Specificity                                     | 8         |           | 7         |           |
| 1-Sensitivity/1-Specificity                                 | 3         |           | 6         |           |
| <b>Benefits</b>                                             |           |           |           |           |
| Reduction in colorectal cancer mortality                    | 5         |           | 5         |           |
| Reduction in colorectal cancer incidence                    | 2         |           | 5         |           |
| Colorectal cancer survival                                  | 1         |           | 1         |           |
| Benefits <sup>b</sup>                                       | 1         |           | 0         |           |
| <b>Harms</b>                                                |           |           |           |           |
| Test-related pain and/or discomfort                         | 6         |           | 7         |           |
| Risk of complications                                       | 2         |           | 5         |           |
| <b>Structural characteristics of health care</b>            |           |           |           |           |
| Information processes                                       | 5         |           | 5         |           |
| Waiting-time for initial screening colonoscopy <sup>a</sup> |           | 2         |           | 0         |
| Travel time to screening facility                           | 1         |           | 1         |           |
| Waiting time for follow-up-test                             | 0         |           | 1         |           |

**Notes:** The bold text indicates the attribute categories; <sup>a</sup>Inductively derived attributes; <sup>b</sup>Includes text passages that indicated a benefit but could not be assigned to a specific benefit outcome due to lack of information.

**Appendix 4** Number (n) of active participants per attribute, stratified by focus group

|                                                             | FG 1      |           | FG 2      |           | FG 3      |           | FG 4      |           | FG 1 – FG 4 |           |
|-------------------------------------------------------------|-----------|-----------|-----------|-----------|-----------|-----------|-----------|-----------|-------------|-----------|
|                                                             | Deductive | Inductive | Deductive | Inductive | Deductive | Inductive | Deductive | Inductive | Deductive   | Inductive |
| Participants (n)                                            | 6         | 6         | 5         | 5         | 5         | 5         | 4         | 4         | 20          | 20        |
| <b>Procedure-related characteristics</b>                    |           |           |           |           |           |           |           |           |             |           |
| Preparation                                                 | 5         |           | 5         |           | 4         |           | 2         |           | 16          |           |
| Procedure                                                   | 4         |           | 5         |           | 5         |           | 3         |           | 17          |           |
| Sedation <sup>a</sup>                                       |           | 5         |           | 5         |           | 3         |           | 3         |             | 16        |
| Purpose                                                     | 4         |           | 3         |           | 2         |           | 1         |           | 10          |           |
| Frequency                                                   | 3         |           | 1         |           | 3         |           | 0         |           | 7           |           |
| Inability to work <sup>a</sup>                              |           | 5         |           | 2         |           | 5         |           | 2         |             | 14        |
| Location                                                    | 0         |           | 3         |           | 0         |           | 3         |           | 6           |           |
| Transportation home <sup>a</sup>                            |           | 3         |           | 3         |           | 2         |           | 2         |             | 10        |
| Follow-up test required                                     | 1         |           | 0         |           | 1         |           | 0         |           | 2           |           |
| Duration                                                    | 3         |           | 0         |           | 0         |           | 1         |           | 4           |           |
| Mode of test delivery                                       | 0         |           | 0         |           | 1         |           | 0         |           | 1           |           |
| <b>Measures of the validity of a screening test</b>         |           |           |           |           |           |           |           |           |             |           |
| Predictive values <sup>a</sup>                              |           | 6         |           | 5         |           | 4         |           | 2         |             | 17        |
| Sensitivity/Specificity                                     | 3         |           | 4         |           | 5         |           | 3         |           | 15          |           |
| 1-Sensitivity/1-Specificity                                 | 0         |           | 3         |           | 4         |           | 2         |           | 9           |           |
| <b>Benefits</b>                                             |           |           |           |           |           |           |           |           |             |           |
| Reduction in colorectal cancer mortality                    | 3         |           | 2         |           | 3         |           | 2         |           | 10          |           |
| Reduction in colorectal cancer incidence                    | 0         |           | 2         |           | 4         |           | 1         |           | 7           |           |
| Colorectal cancer survival                                  | 2         |           | 0         |           | 0         |           | 0         |           | 2           |           |
| Benefits <sup>b</sup>                                       | 0         |           | 0         |           | 0         |           | 1         |           | 1           |           |
| <b>Harms</b>                                                |           |           |           |           |           |           |           |           |             |           |
| Test-related pain and/or discomfort                         | 4         |           | 4         |           | 3         |           | 2         |           | 13          |           |
| Risk of complications                                       | 0         |           | 3         |           | 4         |           | 0         |           | 7           |           |
| <b>Structural characteristics of health care</b>            |           |           |           |           |           |           |           |           |             |           |
| Information processes                                       | 6         |           | 4         |           | 0         |           | 0         |           | 10          |           |
| Waiting-time for initial screening colonoscopy <sup>a</sup> |           | 0         |           | 1         |           | 0         |           | 1         |             | 2         |
| Travel time to screening facility                           | 0         |           | 2         |           | 0         |           | 0         |           | 2           |           |
| Waiting time for follow-up-test                             | 0         |           | 0         |           | 1         |           | 0         |           | 1           |           |

**Notes:** The bold text indicates the attribute categories; <sup>a</sup>Inductively derived attributes; <sup>b</sup>Includes text passages that indicated a benefit but could not be assigned to a specific benefit outcome due to lack of information.

**Abbreviations:** FG, focus group.
